# Supplementary material for: A Multi-Informant Study of the Validity of the Inventory of Callous-Unemotional Traits in a Sample of Norwegian Adolescents with Behavior Problems
Source: Springer Nature journal article supplement (doi:10.1007/s10862-020-09788-6), 2020-02-15
Supplement: MOESM1 [file 17712108]

# Online Resource 1.

## The results of Confirmatory Factor Analysis of the Inventory of Callous-Unemotional traits when method variance is not entered in the models.

Fit-indices of the tested models of the ICU-Parent without a method variance element.

|  | X2, *df* | CFI | TLI | RMSEA [90%CI] | WRMR |
| --- | --- | --- | --- | --- | --- |
| Unidimensional | 797.171 / 252 | .770 | .749 | 0.117 [.108-.126] | 1.58 |
| Unidimensional-short | 109.726 / 35 | .927 | .907 | 0.117 [.092-.142] | 1.00 |
| 3-bifactor | 439.130 / 228 | .911 | .892 | 0.077 [.066-.087] | 1.01 |

Fit-indices of the tested models of the ICU-Self without a method variance element.

|  | X2, *df* | CFI | TLI | RMSEA [90% CI] | WRMR |
| --- | --- | --- | --- | --- | --- |
| Unidimensional | 982.521 / 252 | .587 | .547 | 0.137 [.128-.146] | 2.67 |
| Unidimensional-short | 248.019 / 35 | .789 | .729 | 0.199 [.176-.222] | 1.45 |
| 3-bifactor | 815.911 / 228 | .667 | .597 | 0.129 [.120-.139] | 1.58 |

Fit-indices of the tested models of the ICU-Teacher without a method variance element.

|  | X2 / *df* | CFI | TLI | RMSEA [90%CI] | WRMR |
| --- | --- | --- | --- | --- | --- |
| Unidimensional | 898.696 / 252 | .776 | .755 | .150 [.139-.161] | 1.76 |
| Unidimensional short | 189.852 / 35 | .864 | .825 | .197 [.170-.225] | 1.36 |
| 3-bifactor | 539.773 / 229[[1]](#footnote-1) | .892 | .870 | .109 [.097-.121] | 1.16 |
|  |  |  |  |  |  |

1. Due to convergence issues in model estimation of the 3-bifactor model using teacher data, item 15 on the Uncaring factor was assigned a specific starting value to enable convergence, hence the additional degree of freedom compared to the model tested in the parent- and youth-data. [↑](#footnote-ref-1)
